# Supplementary material for: A pre-constructed graphene–ammonium polyphosphate aerogel (GAPPA) for efficiently enhancing the mechanical and fire-safety performances of polymers
Source: Royal Society of Chemistry journal article supplement (doi:10.1039/c8ta00736e), 2018-01-01
Supplement: c8ta00736e1.pdf [file c8ta00736e1.pdf]

## Supporting Information

### Pre-constructed Graphene-Ammonium Polyphosphate Aerogel (GAPPA) for Efficient Enhancing Mechanical and Fire-Safety Performances of Polymer

Lei Wang<sup>a</sup>, Shuhong Wu<sup>a</sup>, Xiangyu Dong<sup>a</sup>, Rui Wang<sup>a</sup>, Liqiang Zhang<sup>a</sup>, Jianlei Wang<sup>a</sup>, Jie Zhong<sup>a</sup>, Lixin Wu<sup>a,b,\*</sup>, Xin Wang<sup>c,\*\*</sup>

*a* Key Laboratory of Design and Assembly of Functional Nanostructures, Fujian Institute of Research on the Structure of Matter, Chinese Academy of Sciences, Fuzhou, Fujian, 350108, China

*b* Fujian Provincial Key Laboratory of Nanomaterials, Fujian Institute of Research on the Structure of Matter, Chinese Academy of Sciences, Fuzhou, Fujian, 350108, China

*c* Department of Chemistry, University of Science and Technology of China, Hefei, Anhui, 230026, China

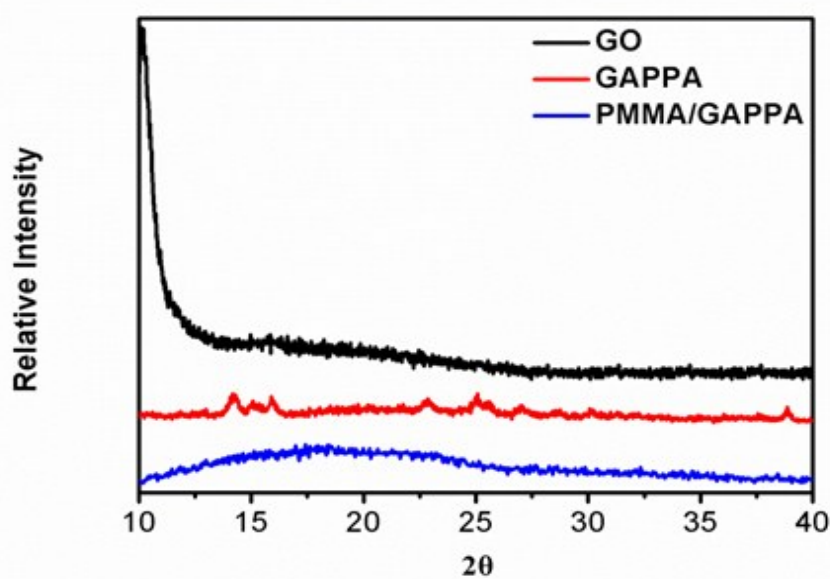

Figure S1. XRD of GO, GAPPA and PMMA/GAPPA composite.

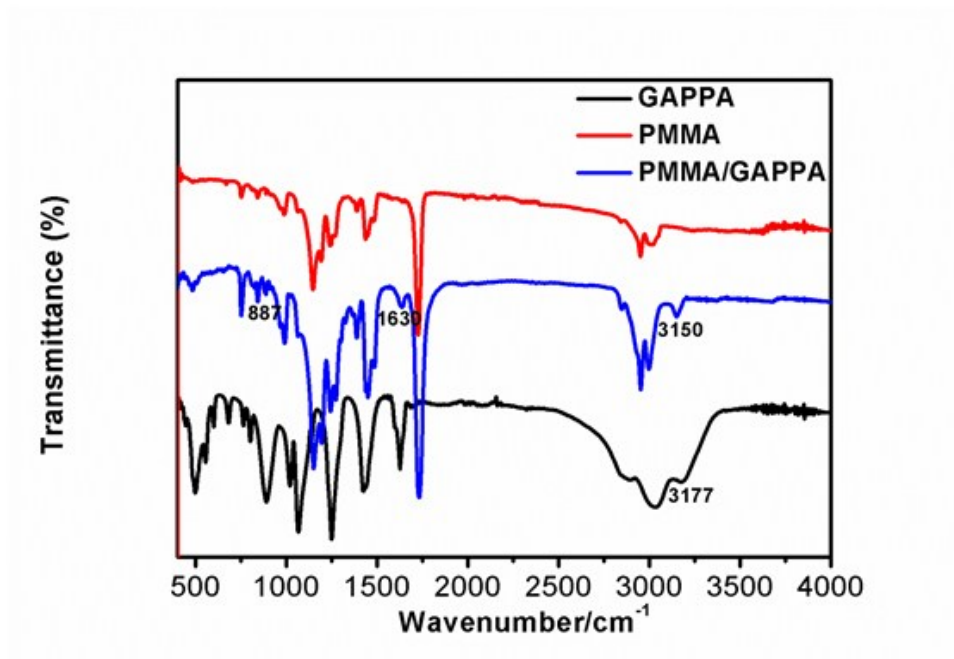

Figure S2. FTIR spectra of PMMA, GAPPA and PMMA/GAPPA composite.

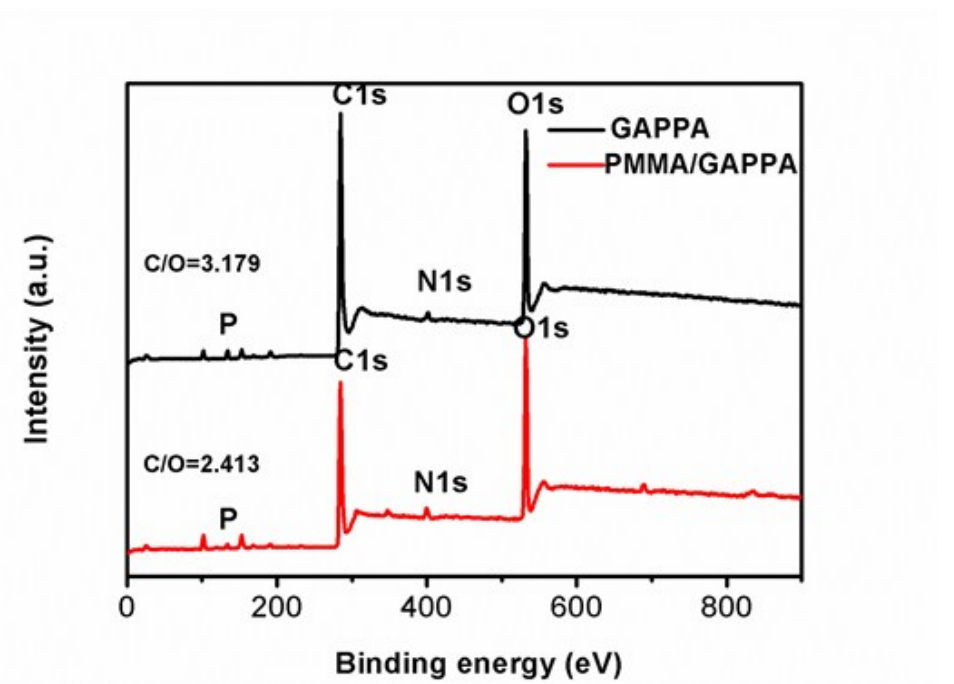

Figure S3. XPS survey pattern of GAPPA and PMMA/GAPPA composite.

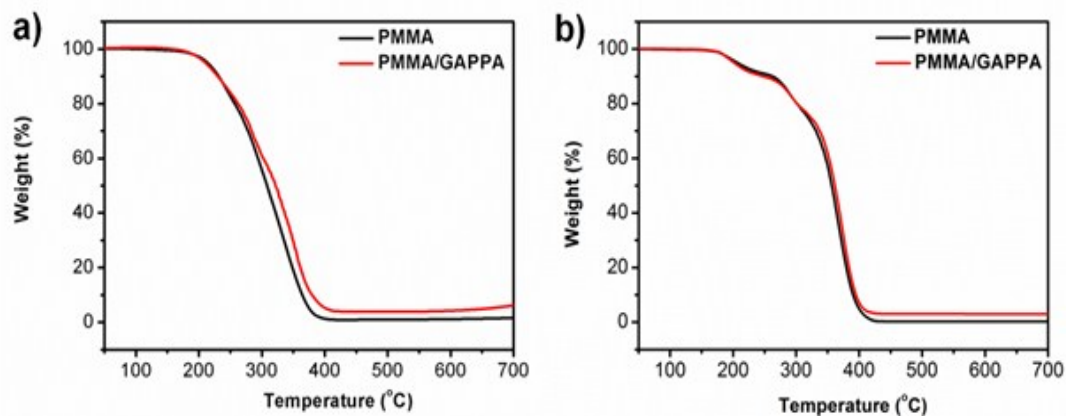

**Figure S4.** TGA analysis of PMMA, PMMA/GAPPA composite under a) air and b) nitrogen atmosphere.

**Table S1.** Physical and mechanical properties of GAPP aerogels prepared with different synthetic parameters.

| <b>Samples</b> | <b>Density (mg/cm<sup>3</sup>)</b> | <b>S<sub>BET</sub> (m<sup>2</sup>/g)</b> | <b>Compression Stress at 50% strain (kPa)</b> | <b>Young's Modulus (kPa)</b> |
|----------------|------------------------------------|------------------------------------------|-----------------------------------------------|------------------------------|
| 1GO/1APP       | 18.56                              | 236.9                                    | 3.00                                          | 0.245                        |
| 1GO/2APP       | 25.82                              | 196.8                                    | 3.57                                          | 0.210                        |
| 1GO/3APP       | 32.90                              | 157.5                                    | 4.47                                          | 0.187                        |
